# Supplementary material for: Energy Transfer between Conjugated Colloidal Ga2O3 and CdSe/CdS Core/Shell Nanocrystals for White Light Emitting Applications
Source: PubMed Central journal article supplement (PMC5302483; doi:10.3390/nano6020032), 2016-02-15

# Supplementary Materials: Energy Transfer between Conjugated Colloidal Ga<sub>2</sub>O<sub>3</sub> and CdSe/CdS Core/Shell Nanocrystals for White Light Emitting Applications

Paul C. Stanish and Pavle V. Radovanovic

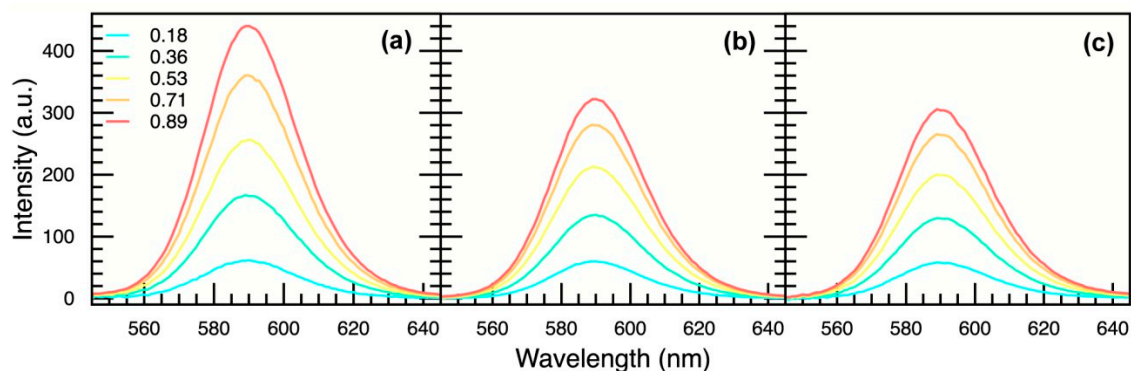

**Figure S1.** Photoluminescence spectra of CdSe/CdS nanocrystals (NCs) in (a) nanocrystal conjugate, linked with thioglycolic acid (TGA), upon correction for the contribution from Ga<sub>2</sub>O<sub>3</sub> NC emission, (b) pure CdSe/CdS nanocrystal suspension, and (c) mixture of Ga<sub>2</sub>O<sub>3</sub> and CdSe/CdS NCs without the TGA linker. The concentrations of CdSe/CdS NCs are identical in all panels, and are expressed in (a) as a [CdSe/CdS]/[Ga<sub>2</sub>O<sub>3</sub>] ratio. The excitation wavelength is 250 nm for all spectra.

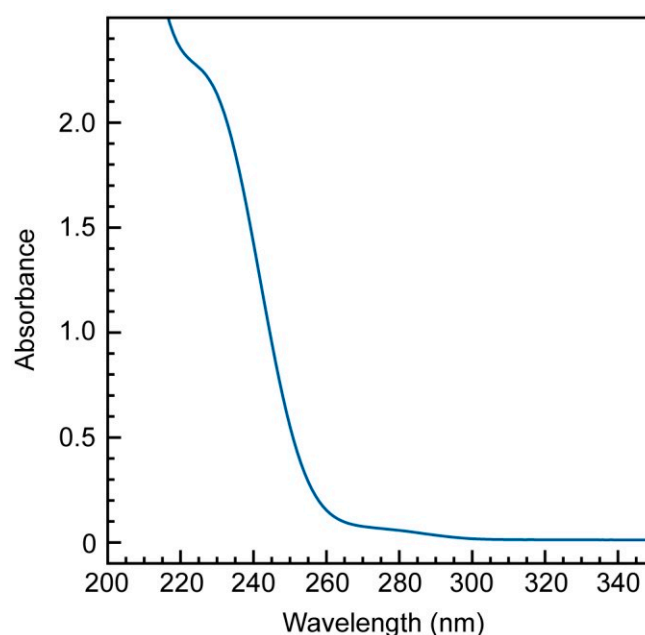

**Figure S2.** Absorption spectrum of TGA molecules in ethanol demonstrating competitive absorption with Ga<sub>2</sub>O<sub>3</sub> NCs at 250 nm.

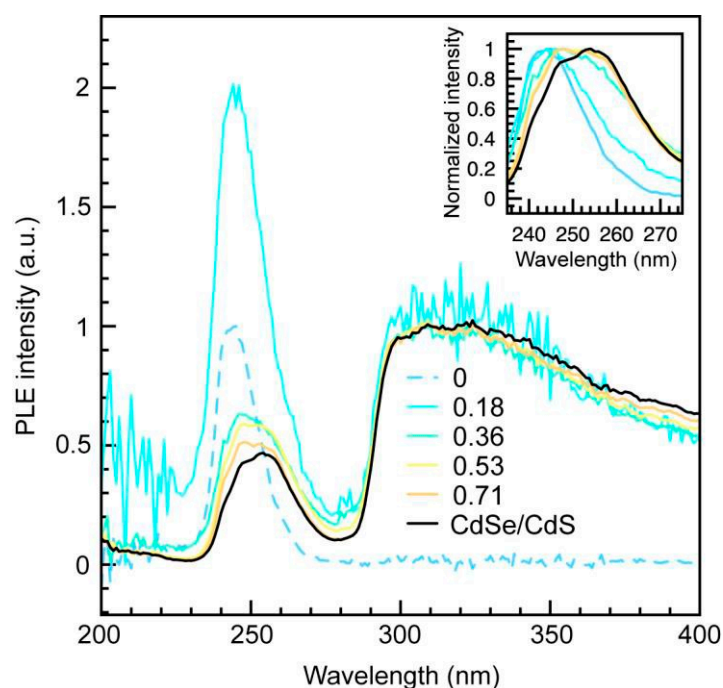

**Figure S3.** Photoluminescence excitation (PLE) spectra of CdSe/CdS- $\text{Ga}_2\text{O}_3$  NC conjugates having different acceptor to donor ratio, as indicated in the graph ( $\lambda_{\text{em}} = 590$  nm). PLE spectra of  $\text{Ga}_2\text{O}_3$  and CdSe/CdS NCs are shown with dashed blue and solid black lines, respectively. Inset: Normalized PLE spectra in the region corresponding to  $\text{Ga}_2\text{O}_3$  NC excitation. The dip in the excitation spectra at ca. 280 nm is due to absorption of tetrahydrofuran (THF) in that region.

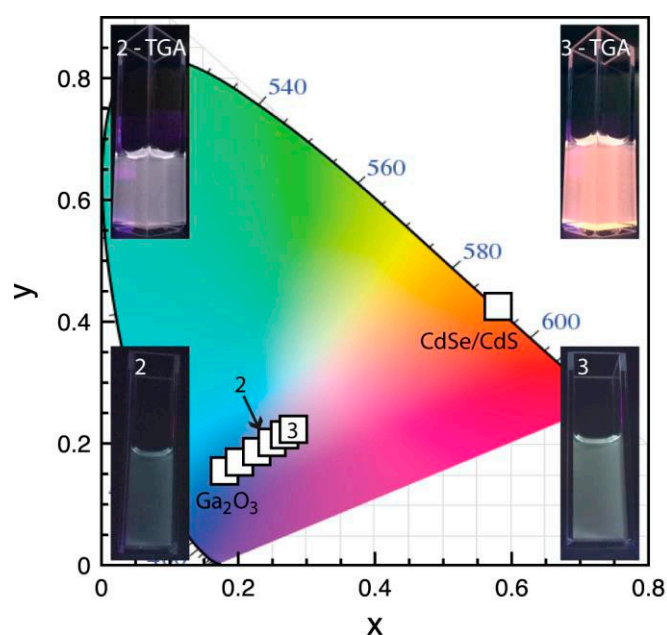

**Figure S4.** International Commission on Illumination 1931 (CIE 1931) color space diagram for suspensions containing a mixture of CdSe/CdS and  $\text{Ga}_2\text{O}_3$  NCs. The mixtures are prepared in an identical way to the samples shown in Figure 7 in the article, but without the TGA linker. Bottom insets show photographs corresponding to points 2 and 3 in the graph. The photographs of analogous samples for the NC conjugates are shown as top insets for comparison.

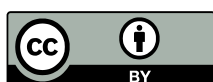

Supplement: nanomaterials-06-00032-s001.pdf [file nanomaterials-06-00032-s001.pdf]
